# Supplementary material for: Visions for the North Sea: The Societal Dilemma Behind Specifying Good Environmental Status
Source: Springer Nature journal article supplement (doi:10.1007/s13280-014-0536-5), 2014-05-23
Supplement: MOESM1 [file 15654060]

*AMBIO*  
**Electronic Supplementary Material**

Visions for the North Sea: the societal dilemma behind specifying Good Environmental Status

Alison J. Gilbert, Abigail McQuatters-Gollop, Olivia Langmead, Laurence Mee, Jan Vermaat

## Electronic Supplementary Material:

Table S1. Elaboration of ecosystem functions and their relevance for benthic ecosystems

| <b>Function</b>      | <b>Definition</b>                                                                                                               | <b>Relevance for benthic ecosystems</b>                                                                                                                            |
|----------------------|---------------------------------------------------------------------------------------------------------------------------------|--------------------------------------------------------------------------------------------------------------------------------------------------------------------|
| Sedimentation        | The act or process by which sediments deposit                                                                                   | Deposition of particulate organic carbon, stabilization of sediments and prevention of erosion, fixes nutrients in sediments for storage and/or further processing |
| Filtration           | The process of separating particles from the fluid in which they are suspended                                                  | Effect of filter and suspension feeders                                                                                                                            |
| Primary production   | The generation of organic compounds, usually via photosynthesis                                                                 | Autotrophs fix carbon for further trophic transfer, photosynthesis is a source of oxygen                                                                           |
| Secondary production | The rate of generation of biomass by heterotrophs                                                                               | Carbon and nutrient transfer through benthic food webs, interception of carbon settling from pelagic zones                                                         |
| Trophic complexity   | The complexity of ecosystem feeding relations                                                                                   | Measured by mean trophic index or mean trophic level (TL) (Pauly et al. 1998; Pauly and Watson 2005)                                                               |
| Nutrient exchange    | The movement of nutrients among biota, between biota and the physical environment, and its import to and export from ecosystems | Role of benthic organisms in transferring nutrients through food webs, influence on microbial production, exchange among water bodies                              |
| Recruitment          | The increase in a natural population as progeny grow and new members arrive                                                     | Of special relevance for demersal species of commercial importance                                                                                                 |

Table S2. Reconstruction of filtering capacity of the oyster community on the Oyster Grounds around 1880

| Variable                                                          | Estimate                                            | Justification                                                                                                                                                                                                                                                                                                                                                                                                    | Sources                                                                                                                     |
|-------------------------------------------------------------------|-----------------------------------------------------|------------------------------------------------------------------------------------------------------------------------------------------------------------------------------------------------------------------------------------------------------------------------------------------------------------------------------------------------------------------------------------------------------------------|-----------------------------------------------------------------------------------------------------------------------------|
| Density of oysters                                                | 5 m <sup>-2</sup>                                   | Conservative: from clump density (3 m <sup>-2</sup> ) and number of individuals per clump (~3)                                                                                                                                                                                                                                                                                                                   | De Vooy et al. (2004); OSPAR (2008)                                                                                         |
| Individual filtering capacity                                     | 2 l h <sup>-1</sup>                                 | Median of 1-3 l h <sup>-1</sup> for 2-3 year-old individuals, depending on quantity and quality of suspended matter, condition of animal and water temperature; older individuals were probably more efficient and would have been more prevalent in the Oyster Grounds; clogging is not likely given that current suspended matter concentrations are generally <2 mg l <sup>-1</sup> during the growing season | Rodhouse 1978; Van Raaphorst et al, (1998); Riisgård and Larsen (2000); Barnabé & Barnabé-Quet (2000); Cugier et al. (2010) |
| Volume filtered by oysters per unit area                          | 0.24 m <sup>3</sup> m <sup>-2</sup> d <sup>-1</sup> | 0.002 (m <sup>3</sup> h <sup>-1</sup> ) x 5 (m <sup>2</sup> ) x 24 (h)                                                                                                                                                                                                                                                                                                                                           |                                                                                                                             |
| Volume filtered by oysters and associated community per unit area | 0.5 m <sup>3</sup> m <sup>-2</sup> d <sup>-1</sup>  | Factor 2 as an estimate. Other filter feeders are known to have been abundantly present; while individual associates had a lower filtration rate, together they may have formed a substantial filtration capacity                                                                                                                                                                                                | De Vooy et al. (2004); Riisgård and Larsen (2000)                                                                           |
| Depth of the water layer that should be processed                 | 15 m                                                | Oyster grounds are stratified during summer; bottom waters are richer in organic particulates and algae between 25 and 40 m                                                                                                                                                                                                                                                                                      | Figure 4 in Van Raaphorst et al (1998)                                                                                      |
| Time needed to filter this water column                           | 30 d                                                | 15 (m) / 0.5 (m <sup>3</sup> m <sup>-2</sup> d <sup>-1</sup> )                                                                                                                                                                                                                                                                                                                                                   |                                                                                                                             |
| Residence time of water over Oyster Grounds during summer         | 50 d                                                | Particularly spring tidal currents will resuspend upper sediments but resettlement is rapid. Mean modeled flushing time is 33 days, range 12-53 days                                                                                                                                                                                                                                                             | Lenhart et al (1995), Van Raaphorst et al, (1998)                                                                           |

Table S3. Feeding method (SF = suspension feeder, DF = deposit feeder, S/P – scavenger/predator), food and growth form of benthic invertebrate species whose distribution in the North Sea changed<sup>a</sup> between 1902-1912 and 2000 (benthic invertebrate species derived from Table 2, Callaway, 2007; biotic traits derived from MarLIN 2006)

|                                    | Species Name                   | Feeding method | Food type                                                                                                | Growth form      |
|------------------------------------|--------------------------------|----------------|----------------------------------------------------------------------------------------------------------|------------------|
| ≥50% reduction in spatial presence | <i>Aequipecten opercularis</i> | SF             | suspended particulate matter, plankton                                                                   | bivalve          |
|                                    | <i>Anomia ephippium</i>        | SF             |                                                                                                          |                  |
|                                    | <i>Arctica islandica</i>       | SF, DF         | phytoplankton                                                                                            | bivalve          |
|                                    | <i>Brissopsis lyrifera</i>     | DF             | detritus, foraminifers, small organisms in sediment                                                      | globose          |
|                                    | <i>Echinocyamus pusillus</i>   | DF             | detritus                                                                                                 | globose          |
|                                    | <i>Modiolus modiolus</i>       | SF             | bacteria, phytoplankton, detritus, dissolved organic matter                                              | bivalve          |
|                                    | <i>Ophiothrix fragilis</i>     | SF, DF         | phytoplankton                                                                                            | radial, stellate |
|                                    | <i>Phaxas pellucidus</i>       | SF             |                                                                                                          | bivalve          |
|                                    | <i>Pisidia longicornis</i>     | SF             |                                                                                                          | articulate       |
|                                    | <i>Spatangus purpureus</i>     | DF             | detritus                                                                                                 | radial, globose  |
|                                    | <i>Velutina velutina</i>       |                |                                                                                                          |                  |
| ≥100% increase in spatial presence | <i>Corystes cassivelaunus</i>  | P/S            | burrowing invertebrates                                                                                  | articulate       |
|                                    | <i>Ebalia spp.</i>             |                |                                                                                                          |                  |
|                                    | <i>Echinocardium cordatum</i>  | DF             | detritus                                                                                                 | globose          |
|                                    | <i>Liocarcinus depurator</i>   | P/S            | polychaetes, crustaceans, molluscs, ophiuroids, fish                                                     | articulate       |
|                                    | <i>Liocarcinus holsatus</i>    | P/S            | carrion, invertebrates (e.g. polychaetes, small bivalves, echinoderms, small crustaceans), juvenile fish | articulate       |
|                                    | <i>Ophiura ophiura</i>         | P/S            | small bivalves, polychaetes, crustaceans, carrion                                                        | radial, stellate |

a The change in distributions of another 18 species was minor or unclear. A chi-square contingency test (two-tailed) was used to compare the feeding types in the above groups and showed a significant difference:  $\chi^2=12.88$ , degrees of freedom=2,  $p=0.0016$ .

## References for ESM

1. Barnabé, G. and R. Barnabé-Quet. 2000. Ecology and management of coastal waters: the aquatic environment. Chichester, UK: Praxis Publishing Limited.
2. Cugier, P., C. Struski, M. Blanchard, J. Mazurié, S. Pouvreau, F. Olivier, J. R. Trigui, and E. Thiébaud. 2010. Assessing the role of benthic filter feeders on phytoplankton production in a shellfish farming site: Mont Saint Michel Bay, France. *Journal of Marine Systems* 82: 21-34.
3. Lenhart, H.J., G. Radach, J.O. Backhaus and T. Pohlmann. 1995. Simulations of the North Sea circulation, its variability, and its implementation as hydrodynamical forcing in ERSEM. *Netherlands Journal of Sea Research* 33: 271-299.
4. MarLIN. 2006. BIOTIC - Biological Traits Information Catalogue. Marine Life Information Network Plymouth: Marine Biological Association of the United Kingdom. Retrieve 8 October, 2012, from <http://www.marlin.ac.uk/biotic>
5. Pauly, D., Christensen, V., Dalsgaard, J., Froese, R. & Torres, F. Jr. 1998. Fishing down marine food webs. *Science* 279: 860–863.
6. Pauly, D., and R. Watson. 2005. Background and interpretation of the 'marine trophic index' as a measure of biodiversity. *Philosophical Transactions of the Royal Society B-Biological Sciences* 360: 415–423.
7. Riisgård, H. U. and P. S. Larsen. 2000. Comparative ecophysiology of active zoobenthic filter feeding, essence of current knowledge. *Journal of Sea Research* 44: 169-193.
